# Supplementary material
Source: PubMed Central journal article supplement (PMC6499689)

**Supplementary Table 1: Ion Channel Drugs**

|                   | Medicine      | Modality       | Indication                     | Route of adm. | Target/Mechanism                                    | Approval/Withdrawal | Company                                       | Essential Medicine (WHO) |
|-------------------|---------------|----------------|--------------------------------|---------------|-----------------------------------------------------|---------------------|-----------------------------------------------|--------------------------|
|                   | Ziconotide    | Peptide        | Chronic pain                   | Intrathecal   | Ca <sub>v</sub> 2.2 inhibitor                       | 2004                | Elan Corporation                              |                          |
|                   | XEP-018       | Peptide        | Periocular wrinkles (cosmetic) | Topical       | Nav1.4 inhibitor                                    |                     | Activen SA                                    |                          |
| Dihydro-pyridines | Nifedipine    | Small molecule | Hypertension                   | PO            | Ca <sub>v</sub> 1.x inhibitor                       | 1981                | Bayer                                         | Yes                      |
|                   | Amlodipine    | Small molecule | Hypertension                   | PO            | Ca <sub>v</sub> 1.x inhibitor                       | 1990                | Pfizer                                        | Yes                      |
|                   | Cilnidipine   | Small molecule | Hypertension                   | PO            | Ca <sub>v</sub> 1.x (Ca <sub>v</sub> 2.2) inhibitor | 1995                | Fuji Viscera Pharmaceutical Company/Ajinomoto |                          |
|                   | Clevidipine   | Small molecule | Acute hypertension             | IV            | Ca <sub>v</sub> 1.x inhibitor                       | 2008                | The Medicines Company                         |                          |
|                   | Efonidipine   | Small molecule | Hypertension                   | PO            | Ca <sub>v</sub> 1.x (Ca <sub>v</sub> 3.x) inhibitor | 1995                | Shionogi & Co                                 |                          |
|                   | Felodipine    | Small molecule | Hypertension                   | PO            | Ca <sub>v</sub> 1.x inhibitor                       | 1991                | Hässle (AstraZeneca)                          |                          |
|                   | Isradipine    | Small molecule | Hypertension                   | PO            | Ca <sub>v</sub> 1.x inhibitor                       | 1990                | Sandoz Pharmaceuticals (Novartis)             |                          |
|                   | Lercanidipine | Small molecule | Hypertension                   | PO            | Ca <sub>v</sub> 1.x inhibitor                       | 1997                | Recordati S.p.A.                              |                          |
|                   | Nicardipine   | Small molecule | Hypertension, Angina           | PO            | Ca <sub>v</sub> 1.x inhibitor                       | 1988                |                                               |                          |
|                   | Nimodipine    | Small molecule | Hypertension, vasospasm        | PO/IV         | Ca <sub>v</sub> 1.x inhibitor                       |                     | Bayer                                         |                          |
|                   | Verapamil     | Small molecule | Hypertension, angina           | PO/IV         | Ca <sub>v</sub> 1.x inhibitor                       | 1981                |                                               | Yes                      |
|                   | Diltiazem     | Small molecule | Hypertension, angina           | PO            | Ca <sub>v</sub> 1.x inhibitor                       |                     |                                               |                          |

**Supplementary Table 1: Ion Channel Drugs**

|  |                    |                |                                        |         |                                                        |                      |                                  |     |
|--|--------------------|----------------|----------------------------------------|---------|--------------------------------------------------------|----------------------|----------------------------------|-----|
|  | Gabapentin         | Small molecule | Pain, Epilepsy                         | PO      | Ca <sub>v</sub> inhibitor (α <sub>2</sub> ,δ)          | 1993                 | Parke-Davies (Pfizer)            |     |
|  | Pregabalin         | Small molecule | Pain, Epilepsy                         | PO      | Ca <sub>v</sub> inhibitor (α <sub>2</sub> ,δ)          | 2004                 | Parke-Davies (Pfizer)            |     |
|  | Flunarizine        | Small molecule | Migraine                               | PO      | Ca <sub>v</sub> inhibitor                              | 1968                 | Jansen Pharmaceutica (J&J)       |     |
|  | Cinnarizine        | Small molecule | Vertigo, motion sickness, sea sickness | IM      | Ca <sub>v</sub> inhibitor                              | 1955                 | Jansen Pharmaceutica (J&J)       |     |
|  | Fluspirilene       | Small molecule | Schizophrenia                          | PO      | Ca <sub>v</sub> inhibitor (unselective)                |                      | Jansen Pharmaceutica (J&J)       |     |
|  | Pinaverium bromide | Small molecule | IBS                                    | PO      | Ca <sub>v</sub> inhibitor                              | 1975                 | Solvay (Abbvie)                  |     |
|  | Mibefradil         | Small molecule | Hypertension, angina                   | PO      | Ca <sub>v</sub> 3.x inhibitor                          | 1997/1998            | Roche                            |     |
|  | Dantrolene         | Small molecule | Malignant hyperthermia                 | IV      | RyR inhibitor                                          | 1974                 |                                  |     |
|  | Capsaicin          | Small molecule | Muscle pain (topical)                  | Topical | TRPV1 activator                                        | 2009 FDA             |                                  |     |
|  | Repaglinide        | Small molecule | Type II diabetes                       | PO      | Direct K <sub>ir</sub> 6.2 inhibitor                   | 1997                 | Novo Nordisk                     |     |
|  | Nateglinide        | Small molecule | Type II diabetes                       | PO      | Direct K <sub>ir</sub> 6.2 inhibitor                   | 2001                 | Novartis                         |     |
|  | Riluzole           | Small molecule | ALS                                    | PO      | K <sub>Ca</sub> activator<br>Na <sub>v</sub> inhibitor | 1995                 | Rhone Poulenc Rorer (Sanofi)     |     |
|  | Chlorzoxazone      | Small molecule | Spasm                                  | PO      | K <sub>Ca</sub> activator                              | 1958                 | McNeilab Inc (Johnson & Johnson) | Yes |
|  | Zoxazolamine       | Small molecule | Spasm                                  | PO      | K <sub>Ca</sub> activator                              | 1955/1961            | McNeilab Inc (Johnson & Johnson) |     |
|  | Ivabradine         | Small molecule | Heart failure                          | PO      | I <sub>f</sub> (HCN) inhibitor                         | 2005 EMA<br>2015 FDA | Servier<br>Amgen                 |     |

**Supplementary Table 1: Ion Channel Drugs**

|                |                      |                |                    |    |                                     |      |                                                |     |
|----------------|----------------------|----------------|--------------------|----|-------------------------------------|------|------------------------------------------------|-----|
|                | Ivacaftor            | Small molecule | CFTR               | PO | CFTR potentiator                    | 2012 | Vertex; Cystic Fibrosis Foundation             |     |
|                | Lumacaftor/ivacaftor | Small molecule | CFTR               | PO | CFTR chaperone plus potentiator     | 2015 | Vertex                                         |     |
| Sulfonyl-ureas | Glibenclamide        | Small molecule | Type II diabetes   | PO | K <sub>Ir</sub> 6.x inhibitor (SUR) | 1966 | Boehringer Mannheim/Hoechst (Novartis, Sanofi) |     |
|                | Tolbutamide          | Small molecule | Type II diabetes   | PO | K <sub>Ir</sub> 6.x inhibitor (SUR) | 1956 | Upjohn Company (Pfizer)                        |     |
|                | Acetohexamide        | Small molecule | Type II diabetes   | PO | K <sub>Ir</sub> 6.x inhibitor (SUR) |      |                                                |     |
|                | Carbutamide          | Small molecule | Type II diabetes   | PO | K <sub>Ir</sub> 6.x inhibitor (SUR) |      | Servier                                        |     |
|                | Chlorpropamide       | Small molecule | Type II diabetes   | PO | K <sub>Ir</sub> 6.x inhibitor (SUR) | 196? | Pfizer                                         |     |
|                | Tolhexamide          | Small molecule | Type II diabetes   | PO | K <sub>Ir</sub> 6.x inhibitor (SUR) |      |                                                |     |
|                | Metahexamide         | Small molecule | Type II diabetes   | PO | K <sub>Ir</sub> 6.x inhibitor (SUR) |      |                                                |     |
|                | Tolazamide           | Small molecule | Type II diabetes   | PO | K <sub>Ir</sub> 6.x inhibitor (SUR) | 196? | Pfizer                                         |     |
|                | Glibornuride         | Small molecule | Type II diabetes   | PO | K <sub>Ir</sub> 6.x inhibitor (SUR) |      | Meda Pharma                                    |     |
|                | Gliclaside           | Small molecule | Type II diabetes   | PO | K <sub>Ir</sub> 6.x inhibitor (SUR) | 1972 |                                                | Yes |
|                | Glipizide            | Small molecule | Type II diabetes   | PO | K <sub>Ir</sub> 6.x inhibitor (SUR) | 1984 | Pfizer                                         |     |
|                | Glisoxepide          | Small molecule | Type II diabetes   | PO | K <sub>Ir</sub> 6.x inhibitor (SUR) |      |                                                |     |
|                | Glycopyramide        | Small molecule | Type II diabetes   | PO | K <sub>Ir</sub> 6.x inhibitor (SUR) |      |                                                |     |
|                | Glimepiride          | Small molecule | Type II diabetes   | PO | K <sub>Ir</sub> 6.x inhibitor (SUR) | 1995 | Hoechst Marion Roussel                         |     |
|                | Diazoxide            | Small molecule | Acute hypertension | PO | K <sub>Ir</sub> 6.x activator       |      |                                                |     |

**Supplementary Table 1: Ion Channel Drugs**

|                  |               |                |                                   |             |                                                 |           |                                |     |
|------------------|---------------|----------------|-----------------------------------|-------------|-------------------------------------------------|-----------|--------------------------------|-----|
|                  | Pinacedil     | Small molecule | Hypertension                      | PO          | K <sub>IR</sub> 6.x activator                   | 1989      | Leo Pharma                     |     |
|                  | Minoxidil     | Small molecule | Hypertension, hair loss           | PO, topical | K <sub>IR</sub> 6.x activator                   | 1979      | Upjohn Company (Pfizer)        |     |
|                  | Nicorandil    | Small molecule | Hypertension, angina              | PO          | K <sub>IR</sub> 6.x activator                   |           | Upjohn Company (Pfizer)        |     |
|                  | Retigabine    | Small molecule | Epilepsy                          | PO          | K <sub>V</sub> 7.2-K <sub>V</sub> 7.5 activator | 2011/2017 | GSK                            |     |
|                  | Flupirtine    | Small molecule | Pain                              | PO          | K <sub>V</sub> 7.2-K <sub>V</sub> 7.5 activator | 1984      | Asta-Medica                    |     |
|                  | Fampridine    | Small molecule | Multiple sclerosis                | PO          | K <sub>V</sub> inhibitor                        | 2010      | Acorda Therapeutics            |     |
|                  | Amifampridine | Small molecule | Lambert–Eaton myasthenic syndrome | PO          | K <sub>V</sub> inhibitor                        | 2009      | BioMarin Pharmaceutical        |     |
|                  | Amiodarone    | Small molecule | Arrhythmia                        | IV, PO      | Multi K channel inhibitor                       | 1961      | Labaz company (Sanofi)         | Yes |
|                  | Dronedarone   | Small molecule | Arrhythmia                        | PO          | Multi K channel inhibitor                       | 2009      | Sanofi-Aventis (Sanofi)        |     |
|                  | Sotalol       | Small molecule | Arrhythmia                        | PO          | Multi K channel inhibitor                       | 1974      | Mead-Johnson Pharmaceutica     |     |
|                  | Ibutulide     | Small molecule | Arrhythmia                        | IV          | Multi K channel inhibitor                       | 1999      | Pfizer                         |     |
|                  | Dofetilide    | Small molecule | Arrhythmia                        | PO          | K <sub>V</sub> 11.1 inhibitor                   | 1999      | Pfizer                         |     |
| Benzo-diazepines | Clorazepate   | Small molecule | Anxiety                           | PO          | GABA <sub>A</sub> activator                     | 1972      |                                |     |
|                  | Estazolam     | Small molecule | Anxiety                           | PO          | GABA <sub>A</sub> activator                     | 1990      | Upjohn Company (Pfizer)        |     |
|                  | Flurazepam    | Small molecule | Anxiety                           | PO          | GABA <sub>A</sub> activator                     | 1970      |                                |     |
|                  | Halazepam     | Small molecule | Anxiety                           | PO          | GABA <sub>A</sub> activator                     | 1981      |                                |     |
|                  | Lorazepam     | Small molecule | Anxiety                           | PO          | GABA <sub>A</sub> activator                     | 1977      | Wyeth Pharmaceuticals (Pfizer) | Yes |

**Supplementary Table 1: Ion Channel Drugs**

|  |                |                |                         |            |                                    |           |                                           |     |
|--|----------------|----------------|-------------------------|------------|------------------------------------|-----------|-------------------------------------------|-----|
|  | Midazolam      | Small molecule | Anxiety                 | PO, IV ,IM | GABA <sub>A</sub> activator        | 1985      | Hoffman LaRoche (Roche)                   | Yes |
|  | Nitrazepam     | Small molecule | Anxiety                 | PO         | GABA <sub>A</sub> activator        | 1965      |                                           |     |
|  | Oxazepam       | Small molecule | Anxiety                 | PO         | GABA <sub>A</sub> activator        | 1965      |                                           |     |
|  | Quazepam       | Small molecule | Anxiety                 | PO         | GABA <sub>A</sub> activator        | 1985      |                                           |     |
|  | Temazepam      | Small molecule | Anxiety                 | PO         | GABA <sub>A</sub> activator        | 1981      |                                           |     |
|  | Triazolam      | Small molecule | Anxiety                 | PO         | GABA <sub>A</sub> activator        | 1982      |                                           |     |
|  | Alprazolam     | Small molecule | Anxiety                 | PO         | GABA <sub>A</sub> activator        | 1981      | Upjohn Company (Pfizer)                   |     |
|  | Zolpidem       | Small molecule | Sleep disorders         | PO         | GABA <sub>A</sub> activator        | 1992      | Synthelabo (Sanofi)                       |     |
|  | Flumazenil     | Small molecule | Benzodiazepine antidote | IV         | GABA <sub>A</sub> binder (neutral) | 1987      | Hoffman LaRoche (Roche)                   |     |
|  | Diazepam       | Small molecule | Anxiety                 | PO         | GABA <sub>A</sub> activator        | 1963      | Hoffman LaRoche (Roche)                   | Yes |
|  | Chlordiapoxide | Small molecule | Anxiety                 | PO         | GABA <sub>A</sub> activator        | 1960      |                                           |     |
|  | Clobazam       | Small molecule | Anxiety, epilepsy       | PO         | GABA <sub>A</sub> activator        | 2011      | Maestretti Research Laboratories (Sanofi) |     |
|  | Clonazepam     | Small molecule | Anxiety                 | PO         | GABA <sub>A</sub> activator        | 1975      | Hoffman-la-Roche (Roche)                  |     |
|  | Phenobarbital  | Small molecule | Epilepsy                | PO, IV, IM | GABA <sub>A</sub> opener           | 1912      | Bayer                                     | Yes |
|  | Alpidem        | Small molecule | Anxiety                 | PO         | GABA <sub>A</sub> activator        | 1991/1995 | Synthelabo (Sanofi)                       |     |
|  | Eszopiclone    | Small molecule | Insomnia                | PO         | GABA <sub>A</sub> activator        |           | Sunovion                                  |     |
|  | Zopiclone      | Small molecule | Insomnia                | PO         | GABA <sub>A</sub> activator        | 1986      | Rhône-Poulenc (Sanofi)                    |     |
|  | Propofol       | Small molecule | General anaesthesia     | IV         | GABA <sub>A</sub> activator        | 1989      |                                           | Yes |

**Supplementary Table 1: Ion Channel Drugs**

|  |                 |                |                                |                        |                                                          |                       |                                           |     |
|--|-----------------|----------------|--------------------------------|------------------------|----------------------------------------------------------|-----------------------|-------------------------------------------|-----|
|  | Valproate       | Small molecule | Epilepsy, bipolar, migraine    | PO                     | GABA <sub>A</sub> modulator                              | 1967                  |                                           | Yes |
|  | Ondansetron     | Small molecule | Chemotherapy associated nausea | PO                     | 5HT <sub>3</sub> antagonist                              | 1991                  | GSK                                       | Yes |
|  | Palonosetron    | Small molecule | Chemotherapy associated nausea | IV, PO                 | 5HT <sub>3A</sub> antagonist                             | 2003 FDA<br>2009 EMA  | Helsinn Healthcare                        |     |
|  | Alosetron       | Small molecule | IBS associated diarrhoea       | PO                     | 5HT <sub>3A</sub> antagonist                             | 2000/2000<br>2002 FDA | GSK                                       |     |
|  | Granisetron     | Small molecule | Chemotherapy associated nausea | PO, IM and transdermal | 5HT <sub>3A</sub> antagonist                             | 1993 FDA<br>2012 EMA  | Beecham (GSK)                             |     |
|  | Phenytoin       | Small molecule | Epilepsy                       | PO                     | Na <sub>v</sub> inhibitor                                | 1953                  | Parke-Davies (Pfizer)                     | Yes |
|  | Phosphenytoin   | Small molecule | Epilepsy                       | IV                     | Na <sub>v</sub> inhibitor (prodrug)                      | 1996                  | Parke-Davies (Pfizer)                     |     |
|  | Carbamazepine   | Small molecule | Epilepsy                       | PO                     | Na <sub>v</sub> inhibitor                                | 1962                  | J.R. Geigy AG (Novartis)                  | Yes |
|  | Eslicarbazepine | Small molecule | Epilepsy                       | PO                     | Na <sub>v</sub> inhibitor                                | 2009                  | Bial                                      |     |
|  | Oxcarbazepine   | Small molecule | Epilepsy                       | PO                     | Na <sub>v</sub> inhibitor                                | 1990                  | Geigy (Novartis)                          |     |
|  | Lamotrigine     | Small molecule | Epilepsy, bipolar              | PO                     | Na <sub>v</sub> inhibitor                                | 1994                  | GSK                                       | Yes |
|  | Lacosamide      | Small molecule | Epilepsy                       | PO                     | Na <sub>v</sub> inhibitor                                | 2008                  | UCB                                       |     |
|  | Primidone       | Small molecule | Epilepsy                       | PO                     | Na <sub>v</sub> inhibitor<br>GABA <sub>A</sub> modulator | 1950                  | Imperial Chemical Industry (Astra Zeneca) |     |
|  | Ethosuximide    | Small molecule | Epilepsy                       | PO                     | Ca <sub>v</sub> inhibitor<br>Na <sub>v</sub> inhibitor   | 1960                  | Parke-Davis (Pfizer)                      | Yes |
|  | Mesuximide      | Small molecule | Epilepsy                       | PO                     | Ca <sub>v</sub> inhibitor<br>Na <sub>v</sub> inhibitor   |                       | Pfizer                                    |     |

**Supplementary Table 1: Ion Channel Drugs**

|  |                 |                |                                 |            |                                                        |                  |                                |     |
|--|-----------------|----------------|---------------------------------|------------|--------------------------------------------------------|------------------|--------------------------------|-----|
|  | Phensuximide    | Small molecule | Epilepsy                        | PO         | Ca <sub>v</sub> inhibitor<br>Na <sub>v</sub> inhibitor |                  | Pfizer                         |     |
|  | Amiloride       | Small molecule | Diuretic                        | PO         | ENaC inhibitor                                         | 1981             | MSD (Merck)                    | Yes |
|  | Triamterene     | Small molecule | Diuretic                        | PO         | ENaC inhibitor                                         | 1964             | Smith Kline & French (GSK)     |     |
|  | Tetracaine      | Small molecule | Local anaesthesia               | IM         | Na <sub>v</sub> inhibitor                              | 1931             |                                |     |
|  | Procainamide    | Small molecule | Arrhythmia                      | IV, PO, IM | Na <sub>v</sub> inhibitor                              | 1951             | Bristol-Meyers Squibb          |     |
|  | Disopyramide    | Small molecule | Arrhythmia                      | PO         | Na <sub>v</sub> inhibitor                              | 1977             |                                |     |
|  | Flecainide      | Small molecule | Arrhythmia                      | PO         | Na <sub>v</sub> inhibitor                              | 1982             |                                |     |
|  | Propafenone     | Small molecule | Arrhythmia                      | PO         | Na <sub>v</sub> inhibitor                              | 1994             | Knoll Pharmaceuticals (Abbvie) |     |
|  | Moracizine      | Small molecule | Arrhythmia                      | PO         | Na <sub>v</sub> inhibitor                              | 1990/2007        | DuPont (Bristol-Myers Squibb)  |     |
|  | Ranolazine      | Small molecule | Chronic angina                  | PO         | Late Na <sub>v</sub> inhibitor                         | 2006             | Gilead                         |     |
|  | Mexiletine      | Small molecule | Arrhythmia                      | PO         | Na <sub>v</sub> inhibitor                              | Still used in US | Boehringer Ingelheim           |     |
|  | Lidocaine       | Small molecule | Local anaesthesia<br>Arrhythmia | IM         | Na <sub>v</sub> inhibitor                              | 1948             |                                | Yes |
|  | Bupivacaine     | Small molecule | Spinal anaesthesia              | IM         | Na <sub>v</sub> inhibitor                              | 1963             |                                | Yes |
|  | Etidocaine      | Small molecule | Local anaesthesia               | IM         | Na <sub>v</sub> inhibitor                              | 1972             |                                |     |
|  | Levobupivacaine | Small molecule | Local anaesthesia               | IM         | Na <sub>v</sub> inhibitor                              | 1995             |                                |     |
|  | Mepivacaine     | Small molecule | Local anaesthesia               | IM         | Na <sub>v</sub> inhibitor                              | 1957             |                                |     |

**Supplementary Table 1: Ion Channel Drugs**

|  |                 |                |                                             |                 |                                                       |                          |                             |     |
|--|-----------------|----------------|---------------------------------------------|-----------------|-------------------------------------------------------|--------------------------|-----------------------------|-----|
|  | Prilocaine      | Small molecule | Local anaesthesia                           | IM              | Na <sub>v</sub> inhibitor                             | 1960                     |                             |     |
|  | Ropivacaine     | Small molecule | Local anaesthesia                           | IM              | Na <sub>v</sub> inhibitor                             | 1997                     |                             |     |
|  | Cisatracurium   | Small molecule | General anaesthesia<br>Neuromuscular block  | IV              | Chrn $\alpha_1\beta_1\gamma/\epsilon\delta$ inhibitor | 1995                     | Burroughs Wellcome (GSK)    |     |
|  | Rocuronium      | Small molecule | General anaesthesia<br>Neuromuscular block  | IV              | Chrn $\alpha_1\beta_1\gamma/\epsilon\delta$ inhibitor | 1994                     | Schering-Plough (Merck)     |     |
|  | Succinylcholine | Small molecule | General anaesthesia<br>Neuromuscular block  | IV              | Chrn $\alpha_1\beta_1\gamma/\epsilon\delta$ activator | 1951                     |                             | Yes |
|  | Varenicline     | Small molecule | Smoking cessation                           | PO              | Chrn $\alpha_4\beta_2$ activator                      | 2006                     | Pfizer                      |     |
|  | Nicotine        | Small molecule | Smoking cessation                           | Topical (skin)  | Chrn activator                                        |                          |                             |     |
|  | Perampanel      | Small molecule | Epilepsy                                    | PO              | GluA1-4 inhibitor                                     | 2012                     | Eisai                       |     |
|  | Felbamate       | Small molecule | Severe epilepsy                             | PO              | GluN inhibitor<br>GABA <sub>A</sub> modulator         | 1993                     | Carter Wallace Laboratories |     |
|  | Ketamine        | Small molecule | Anaesthesia                                 | IV              | GluN inhibitor                                        | 1970                     |                             | Yes |
|  | Memantine       | Small molecule | Alzheimer's                                 | PO              | GluN inhibitor                                        | 1968                     | Eli Lilly and Company       |     |
|  | Amantidine      | Small molecule | Parkinson's disease<br>(historical for flu) | PO slow release | GluN inhibitor                                        | 2017/2018 (formulations) |                             |     |




 ω-MVIIA CKGKGAKCSRLMYDCCTGSCRSKGC      Ziconotide, Prialt<sup>®</sup>


 m-TRTX-Pn3a DCRYMFGDCEKDEDCCCKHLGCKRKMKYCAWDFTF


 α-conotoxin Vc1.1 GCCSDPRCNYDHPEIC


 α-conotoxin RgA GCCSDPRCRYRCR


 α-conotoxin RgIA4 GCCTDP-Cit-CR93-I-Tyr)QCY      KCP-400


 Chlorotoxin MCMPCFTTDHQMARKDDCCGGKGRGKCYGQPQLCR      Tozuleristide  
Tumor Paint

SOR-C27 EGKLSSNDTEGGLCKEFLHPSKVDLPR

SOR-C13 KEFLHPSKVDLPR


 Pi-hexatoxin-H1a NECIRKWLSCVDRKNDCCGLECYKRRHSFEVCVPIPG


 Pi-hexatoxin-H1a FCLVKWKQCDGRERDCCAGLECWKRSGNKSSVCAPIT


 Kappa theraphotoxin Hm1a ECRYLFGGCSSTSDCCKHLSCRSDWKYCAWDGTF

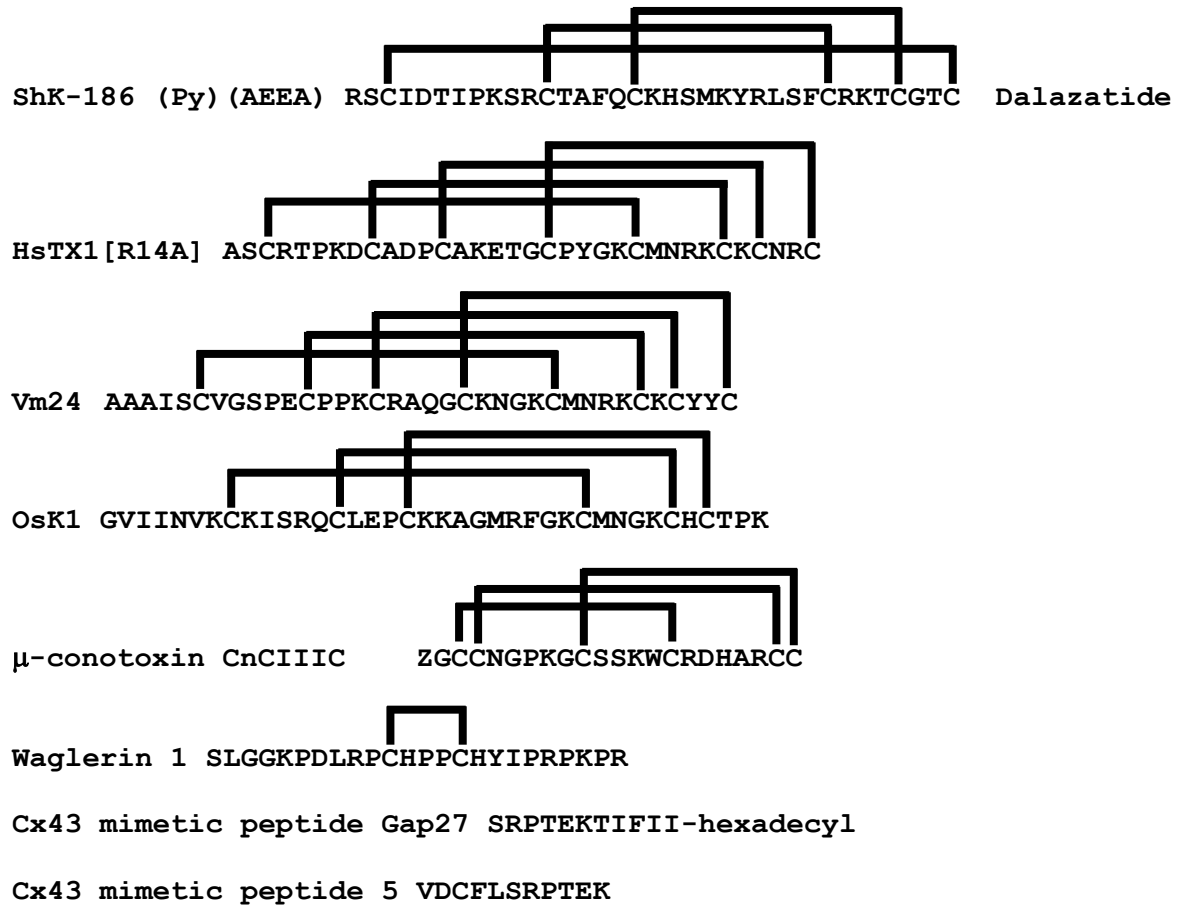

Supplement: NIHMS1016397-supplement-1.pdf [file NIHMS1016397-supplement-1.pdf]
